# Supplementary material
Source: ML conference proceedings conference paper supplement (https://aclanthology.org/2026.semeval-1.397)

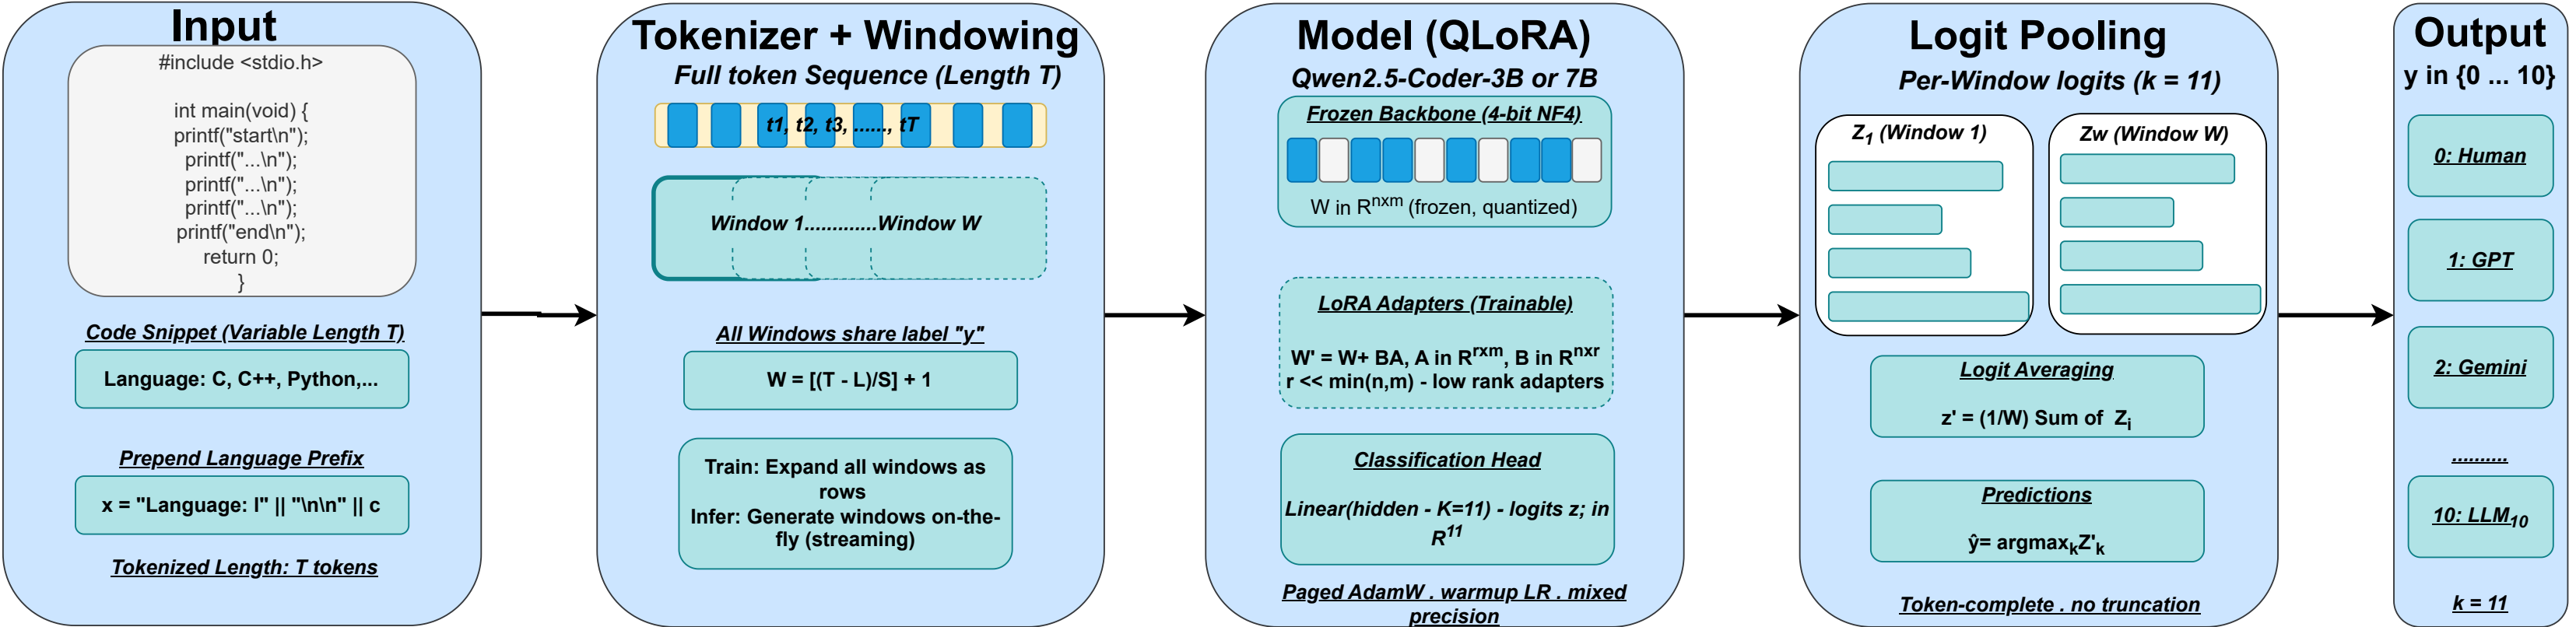

Supplement: SupplementaryMaterial [file semeval.drawio.pdf › figs/semeval.drawio.pdf]

### Train set: label distribution

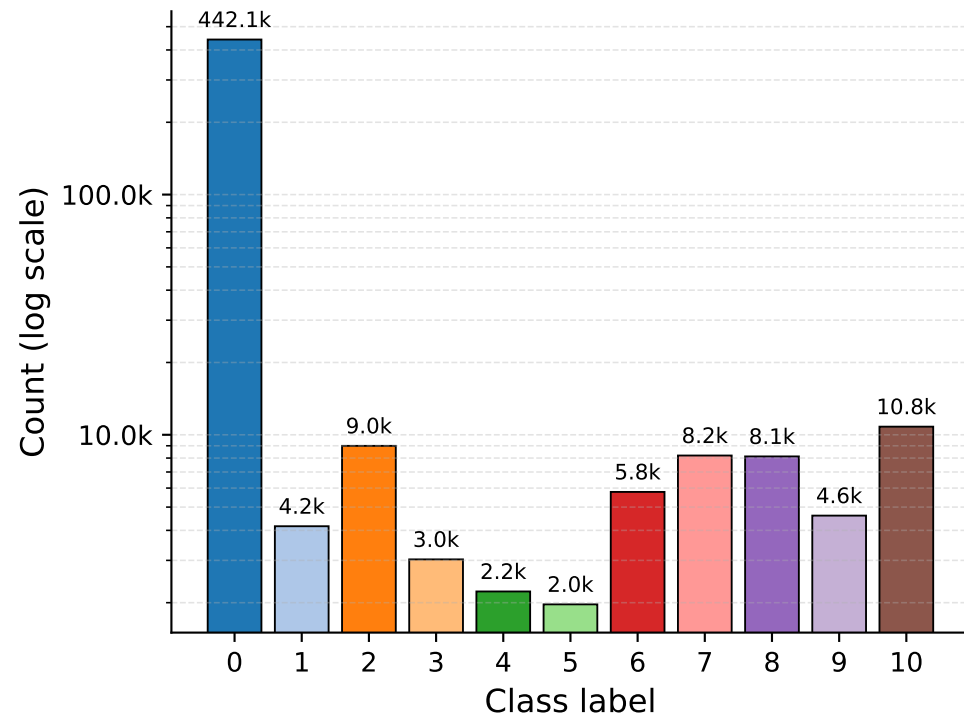

### Minority classes (excluding label 0)

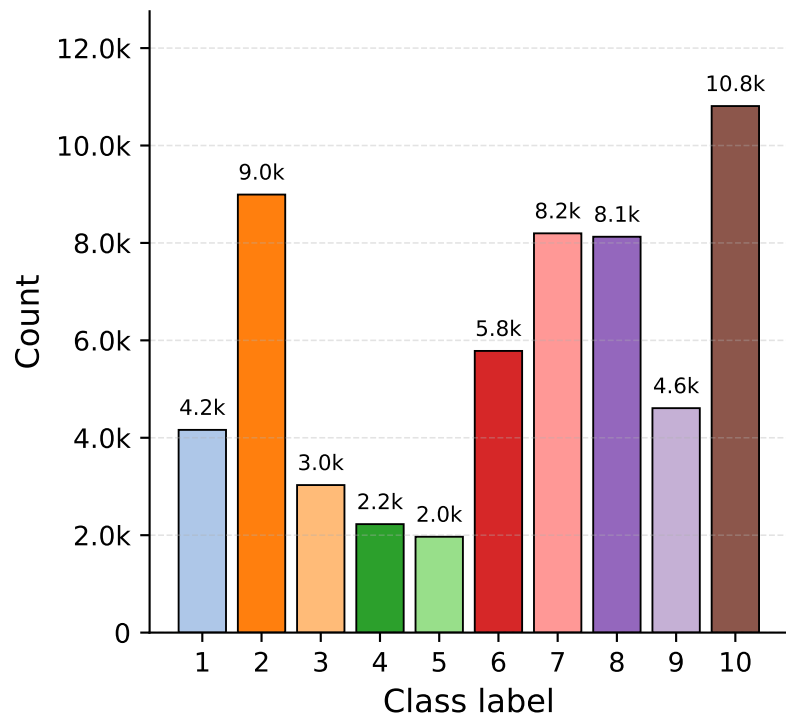

Supplement: SupplementaryMaterial [file train_label_distribution.pdf › figs/train_label_distribution.pdf]

### Validation set: label distribution

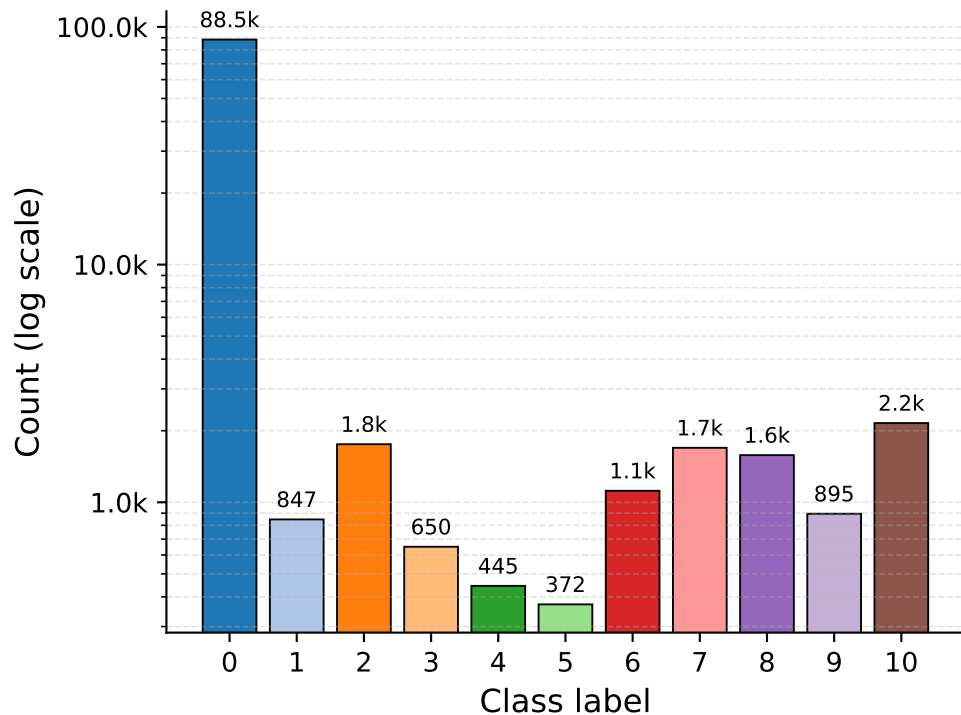

### Minority classes (excluding label 0)

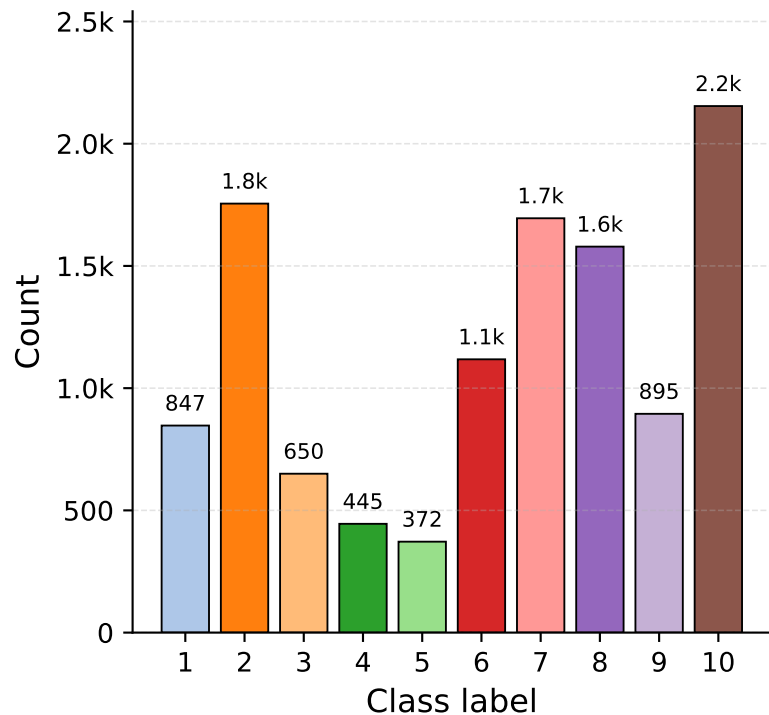

Supplement: SupplementaryMaterial [file val_label_distribution.pdf › figs/val_label_distribution.pdf]
